# Supplementary material for: Identifying and eliminating false positives in thermal-assisted photocatalysis
Source: Royal Society of Chemistry journal article supplement (doi:10.1039/d4cc03246b), 2024-01-01
Supplement: d4cc03246b1.pdf [file d4cc03246b1.pdf]

**Supporting Information**  
**of**  
**Identifying and eliminating false positives in thermal-assisted**  
**photocatalysis**

Yajie Feng<sup>1</sup>, Chi Lin<sup>1</sup>, Jiangping Ma<sup>1</sup>, Chaogang Ban<sup>1</sup>, Wenling Zhao<sup>1</sup>, Xiaoping Tao<sup>1\*</sup>,  
Liyong Gan<sup>1,2,3\*</sup>, Xiaoyuan Zhou<sup>1,2,3\*</sup>

1 College of Physics and Center of Quantum Materials and Devices, Chongqing University, Chongqing 401331, China

2 Chongqing Institute of New Energy Storage Material and Equipment, Chongqing 401120, China

3 State Key Laboratory of Coal Mine Disaster Dynamics and Control, Chongqing University, Chongqing 400044, China

\* Correspondence and request for materials should be addressed to X.Y. Zhou (Email: xiaoyuan2013@cqu.edu.cn), L.Y. Gan (Email: ganly@cqu.edu.cn), X.P. Tao (Email: xptao@cqu.edu.cn).

## **Experimental section**

### **Materials and chemicals**

TiO<sub>2</sub> (anatase-80%, rutile-20%,) was purchased from Degussa Corporation, Germany. H<sub>2</sub>PtCl<sub>6</sub>·xH<sub>2</sub>O was purchased from Shanghai Aladdin Bio-Chem Technology Co., LTD.

### **Preparation of Pt/TiO<sub>2</sub> catalyst**

Pt was induced on TiO<sub>2</sub> by an in situ photodeposition method. Typically, 100 mg TiO<sub>2</sub> and 0.1 wt.% H<sub>2</sub>PtCl<sub>6</sub>·xH<sub>2</sub>O were dispersed into 40 ml 10 vol.% methanol aqueous solution. Then, the solution was purged with argon for 20 min to remove oxygen and sealed for postdeposition induced by a 300 W Xe lamp for 1 hours. Finally, the Pt/TiO<sub>2</sub> was obtained by centrifugation, washed with deionized water for three times, and dried in the oven for 6 h at 60 °C.

### **Thermal-assisted photocatalytic hydrogen evolution**

The thermal-assisted photocatalytic hydrogen evolution experiment was performed in a Pyrex vessel connected to a closed glass circulation and evacuation system (Beijing Perfectlight, Labsolar-6A), and the temperature of the system was controlled by circulating condensed water system. A 300 W Xe lamp was used as a light source. A 20 mg of catalysts dispersed in 100 ml of methanol aqueous solution was prepared. Firstly, the slurry in the reactor was vacuumed for 30 minutes in order to remove the dissolved gas molecular and to assure that the reactor can be operated in an anaerobic condition. During the hydrogen production test, the catalyst was kept in suspension by continuous magnetic stirring. The reaction temperatures are kept at about 15, 35, 55 and 75°C. The amount of hydrogen gas was calculated by the peak area of the product signal, which is recorded by an on-line gas chromatograph (Techcomp, GC7900, MS-5A column, thermal conductivity detectors, Ar carrier). An amount of ~0.45 mmol Ar gas was injected into the system every time before testing the yield to

promote the gas diffusion. The evolved H<sub>2</sub> for Fig. S3-S6 were measured by chromatograph (GC2014, Shimadzu) with a TCD detector using Ar as the carrier gas.

### **Material characterizations**

To characterize the crystal structures of catalysts, powder X-ray diffraction (XRD) was conducted using a PANalytical X'Pert Power apparatus (Netherlands) operated at Cu *K* $\alpha$  radiation was collected on a LabRAM HR Evolution imaging microscope system. A scanning electron microscopy (Thermo Fisher Scientific Quattro S, USA) was conducted to investigate the morphology. Transmission electron microscopy (TEM, Thermo Fisher Scientific Talos F200S) was utilized to investigate the morphology of the samples. HAADF-STEM images and STEM-EDS mapping images of samples were collected on a FEI Titan Themis.

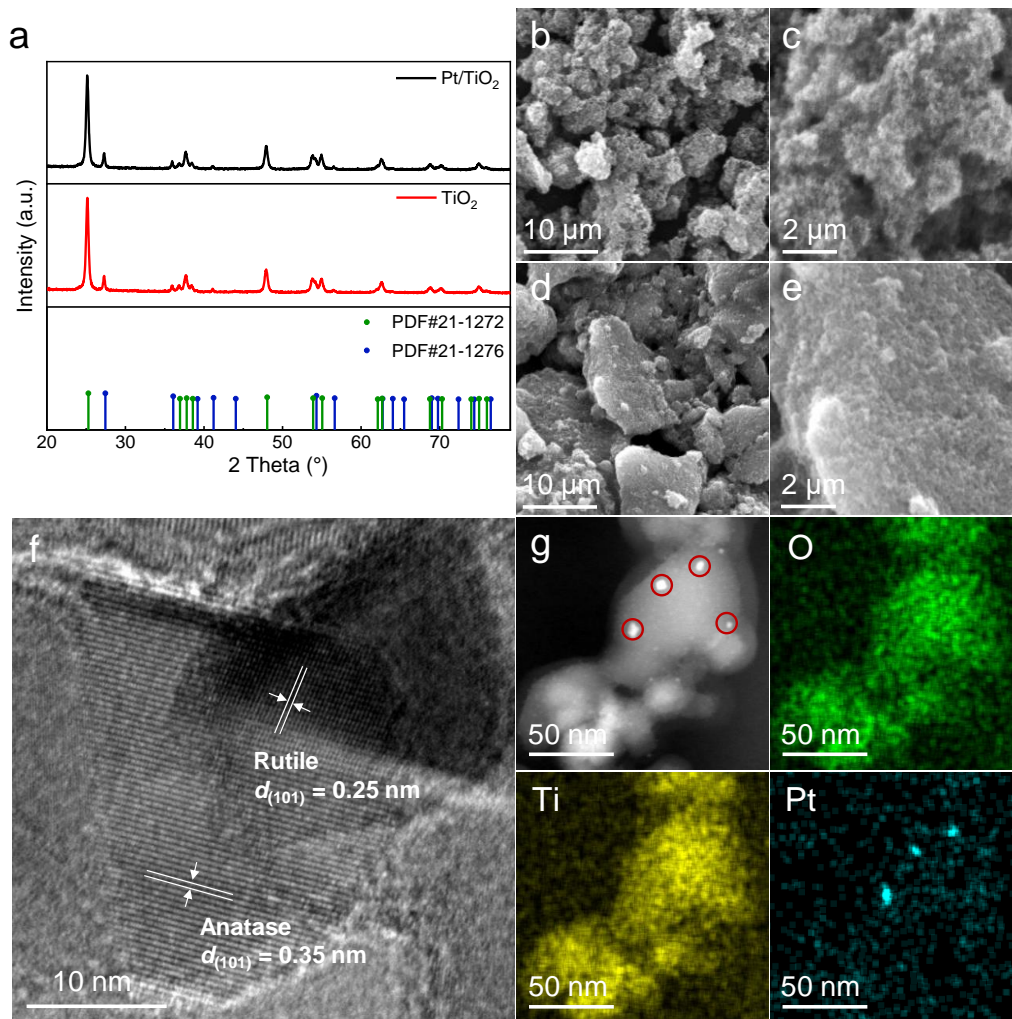

Figure S1. Characterization of TiO<sub>2</sub> and Pt/TiO<sub>2</sub> particles. (a) XRD pattern. (b), (c) SEM image of TiO<sub>2</sub>. (d), (e) SEM image of Pt/TiO<sub>2</sub>. (f) HRTEM image of TiO<sub>2</sub>. (g) EDS mapping of Pt/TiO<sub>2</sub>.

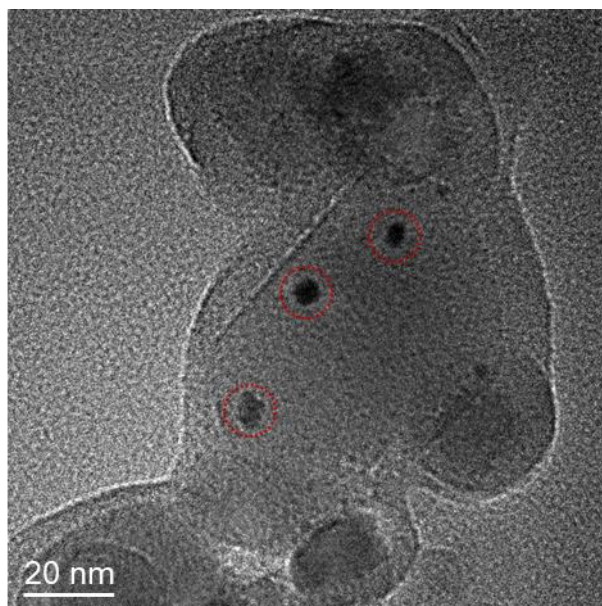

Figure S2. The TEM of Pt/TiO<sub>2</sub> catalyst.

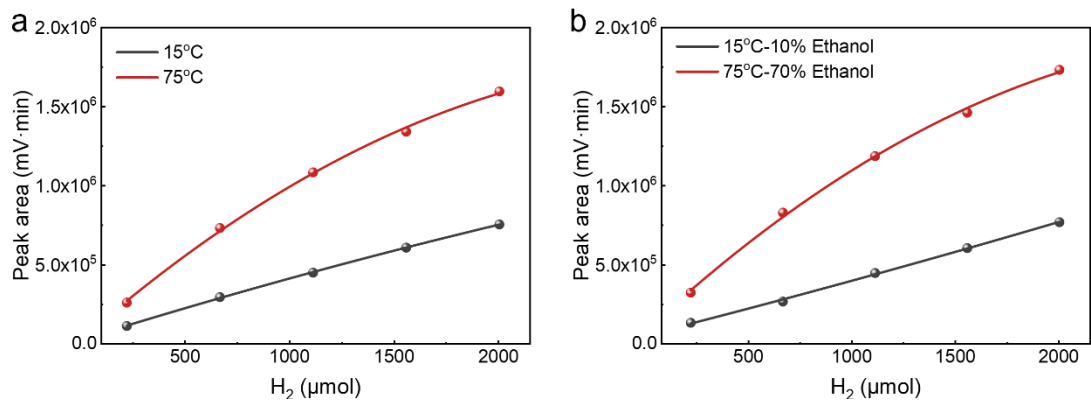

Figure S3. (a) Calibration curves of hydrogen at  $T = 15^{\circ}\text{C}$ ,  $75^{\circ}\text{C}$  with pure water. (b) Calibration curves of hydrogen at  $15^{\circ}\text{C}$  with 10 vol.% ethanol and at  $75^{\circ}\text{C}$  with 70 vol.% ethanol. The  $\text{H}_2$  were measured by chromatograph (GC2014, Shimadzu) with a TCD detector using Ar as the carrier gas.

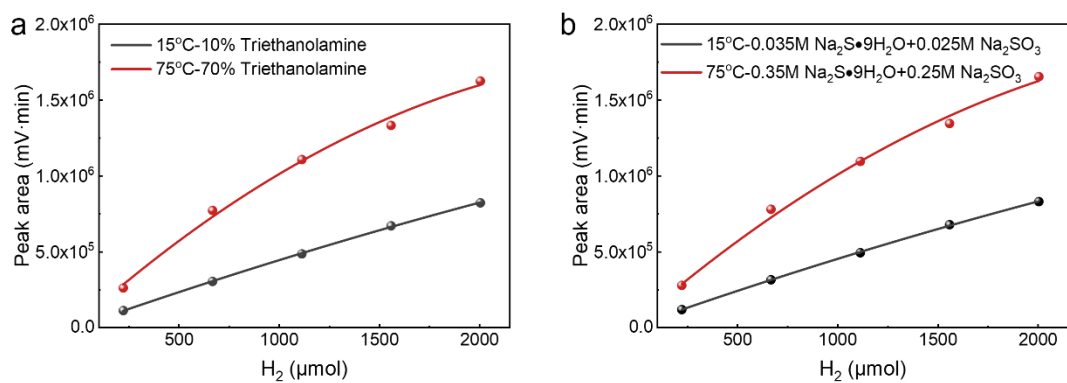

Figure S4. (a) Calibration curves of hydrogen at 15°C with 10 vol.% triethanolamine, and at 75°C with 70 vol.% triethanolamine. (b) Calibration curves of hydrogen at 15°C with 0.035 M Na<sub>2</sub>S•9H<sub>2</sub>O and 0.025 M Na<sub>2</sub>SO<sub>3</sub>, and at 75°C with 0.35 M Na<sub>2</sub>S•9H<sub>2</sub>O and 0.25 M Na<sub>2</sub>SO<sub>3</sub>. The H<sub>2</sub> were measured by chromatograph (GC2014, Shimadzu) with a TCD detector using Ar as the carrier gas.

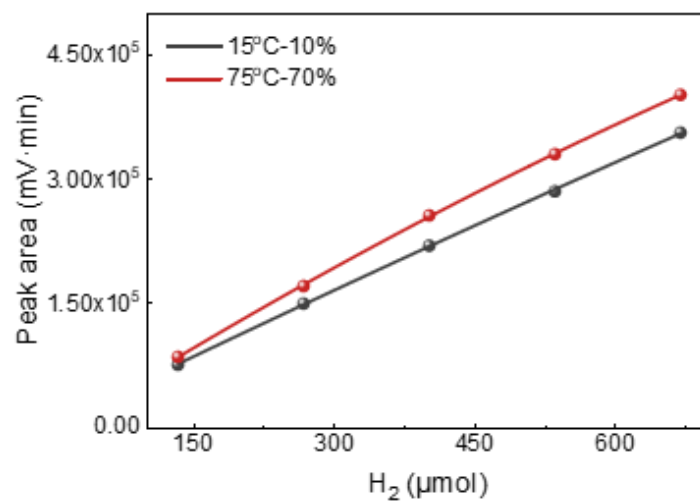

Figure S5. Calibration curves of hydrogen at  $T = 15^{\circ}\text{C}$ ,  $75^{\circ}\text{C}$  and  $C(\text{methanol}) = 10\%$  and  $70\%$ . The experiments were performed with 1ml of  $\text{H}_2\text{O}$  solution containing 10 vol.% and 70 vol.% methanol at  $15^{\circ}\text{C}$  and  $75^{\circ}\text{C}$ . The  $\text{H}_2$  were measured by chromatograph (GC2014, Shimadzu) with a TCD detector using Ar as the carrier gas.



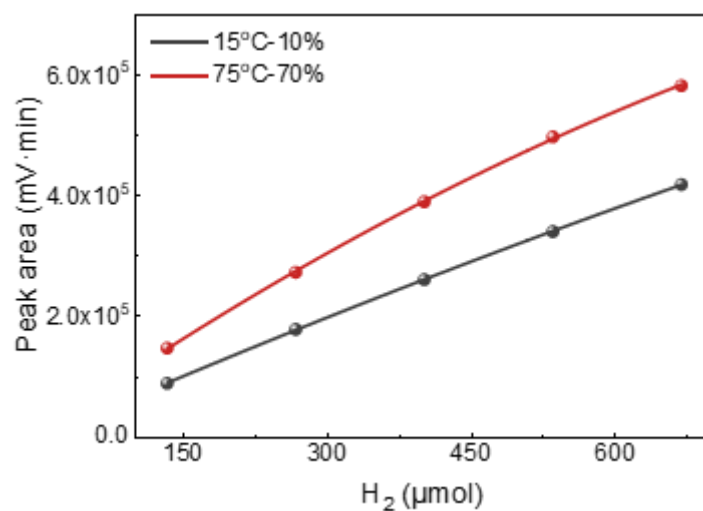

Figure S6. Calibration curves of hydrogen at  $T = 15^{\circ}\text{C}$ ,  $75^{\circ}\text{C}$  and  $C_{(\text{methanol})} = 10\%$  and  $70\%$ . The experiments were performed with 20 ml of  $\text{H}_2\text{O}$  solution containing 10 vol.% and 70 vol.% methanol. The  $\text{H}_2$  were measured by chromatograph (GC2014, Shimadzu) with a TCD detector using Ar as the carrier gas.

Table S1. Fitting parameters of the calibration curves.

| Equation           | $y = ax + bx^2$ |          |                |
|--------------------|-----------------|----------|----------------|
| Reaction condition | a               | b        | R <sup>2</sup> |
| 15°C-10 vol.%      | 2177.40439      | -0.12734 | 0.99989        |
| 15°C-30 vol.%      | 2422.3322       | -0.13532 | 0.99987        |
| 15°C-50 vol.%      | 3282.26996      | -0.51194 | 0.99692        |
| 15°C-70 vol.%      | 3758.97446      | -0.67975 | 0.99815        |
| 35°C-10 vol.%      | 3220.00883      | -0.3987  | 0.99944        |
| 35°C-30 vol.%      | 3426.3584       | -0.45473 | 0.99854        |
| 35°C-50 vol.%      | 4123.19048      | -0.66009 | 0.99883        |
| 35°C-70 vol.%      | 5632.86803      | -1.20042 | 0.99786        |
| 55°C-10 vol.%      | 4935.00418      | -0.8746  | 0.99981        |
| 55°C-30 vol.%      | 5693.5552       | -1.05628 | 0.99997        |
| 55°C-50 vol.%      | 6842.05768      | -1.06145 | 0.99939        |
| 55°C-70 vol.%      | 7736.70662      | -1.36244 | 0.99989        |
| 75°C-10 vol.%      | 5473.58139      | -0.41836 | 0.99997        |
| 75°C-30 vol.%      | 5737.32296      | -0.38392 | 0.99994        |
| 75°C-50 vol.%      | 7109.57474      | -1.1356  | 0.99927        |
| 75°C-70 vol.%      | 7267.93908      | -1.10728 | 0.99893        |
